# Supplementary material
Source: PubMed Central journal article supplement (PMC5951018)
Supplement: supplementary_material_01.pdf [file supplementary_material_01.pdf]

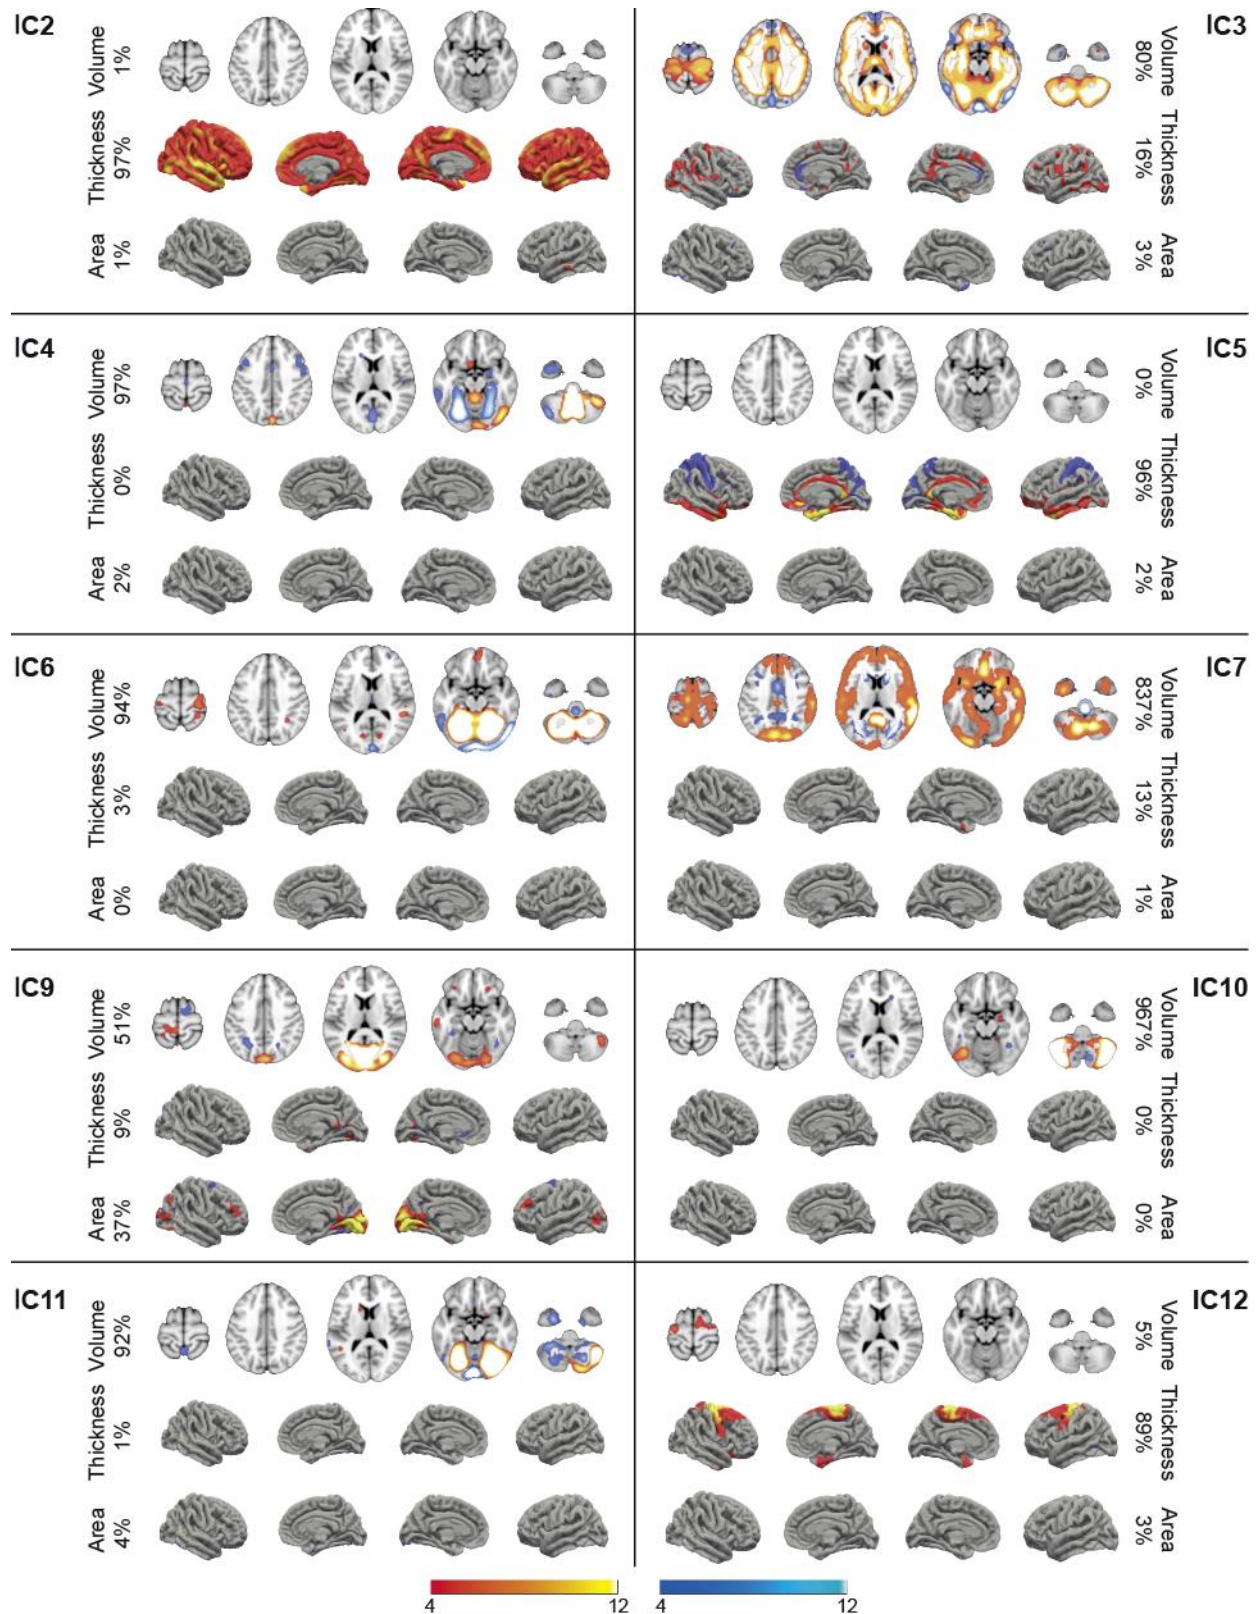

**Supplemental Figure:**

**Spatial maps of independent components (ICs).** Spatial maps of the selected ICs give the regional extent and contribution of each gray matter modality, i.e., volume, thickness and area ( $z > 4$ ), to the generation of the IC. Colors indicate positive (red/yellow) or negative (blue/light-blue) co-variations within the network, percentages give the amount of weighted variance that is explained by each modality. Maps are drawn on a standard brain.
